# Supplementary material for: Nano molar detection of Cd(ii) ions by luminescent metallo-supramolecular polymer formation
Source: Royal Society of Chemistry journal article supplement (doi:10.1039/c5tc02734a), 2015-01-01
Supplement: c5tc02734a1.pdf [file c5tc02734a1.pdf]

Supporting Information

## Nano Molar Detection of Cd(II) Ions by Luminescent Metallo-Supramolecular Polymer Formation

Md. Delwar Hossain,<sup>1,2</sup> Rakesh K. Pandey,<sup>1,2</sup> Utpal Rana<sup>1,2</sup> and Masayoshi Higuchi<sup>\*,1,2</sup>

<sup>1</sup>Electronic Functional Materials Group, Polymer Materials Unit, National Institute for Materials Science (NIMS), 1-1 Namiki, Tsukuba 305-0044, Japan

<sup>2</sup>JST-CREST

### Table of Contents

|                                                                  |     |
|------------------------------------------------------------------|-----|
| 1. Synthetic scheme & NMR spectra of <b>L2</b>                   | S 2 |
| 2. Molecular weight measurement                                  | S 3 |
| 3. Cd-Cd distance in <b>polyCd</b>                               | S 3 |
| 4. IR spectra of <b>polyCd</b> and <b>L2-Cd-L2</b>               | S 4 |
| 5. UV-vis spectra of <b>L1</b> and <b>polyCd</b>                 | S 5 |
| 6. UV-vis spectra of <b>L2</b> and <b>L2-Cd-L2</b>               | S 5 |
| 7. UV-vis spectral titration in the synthesis of <b>L2-Cd-L2</b> | S 6 |
| 8. Binding constants of <b>polyCd</b> and <b>L2-Cd-L2</b>        | S 6 |
| 9. Emission spectra of <b>L2</b> and <b>L2-Cd-L2</b>             | S 7 |
| 10. Reference                                                    | S 7 |

## 1. Synthetic scheme and NMR spectra of L2

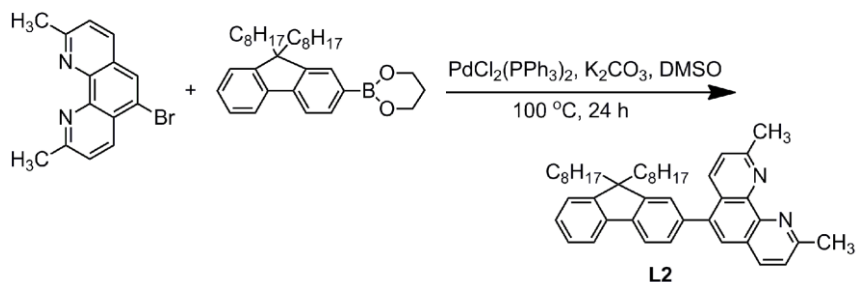

**Scheme S1. Synthesis of L2.**

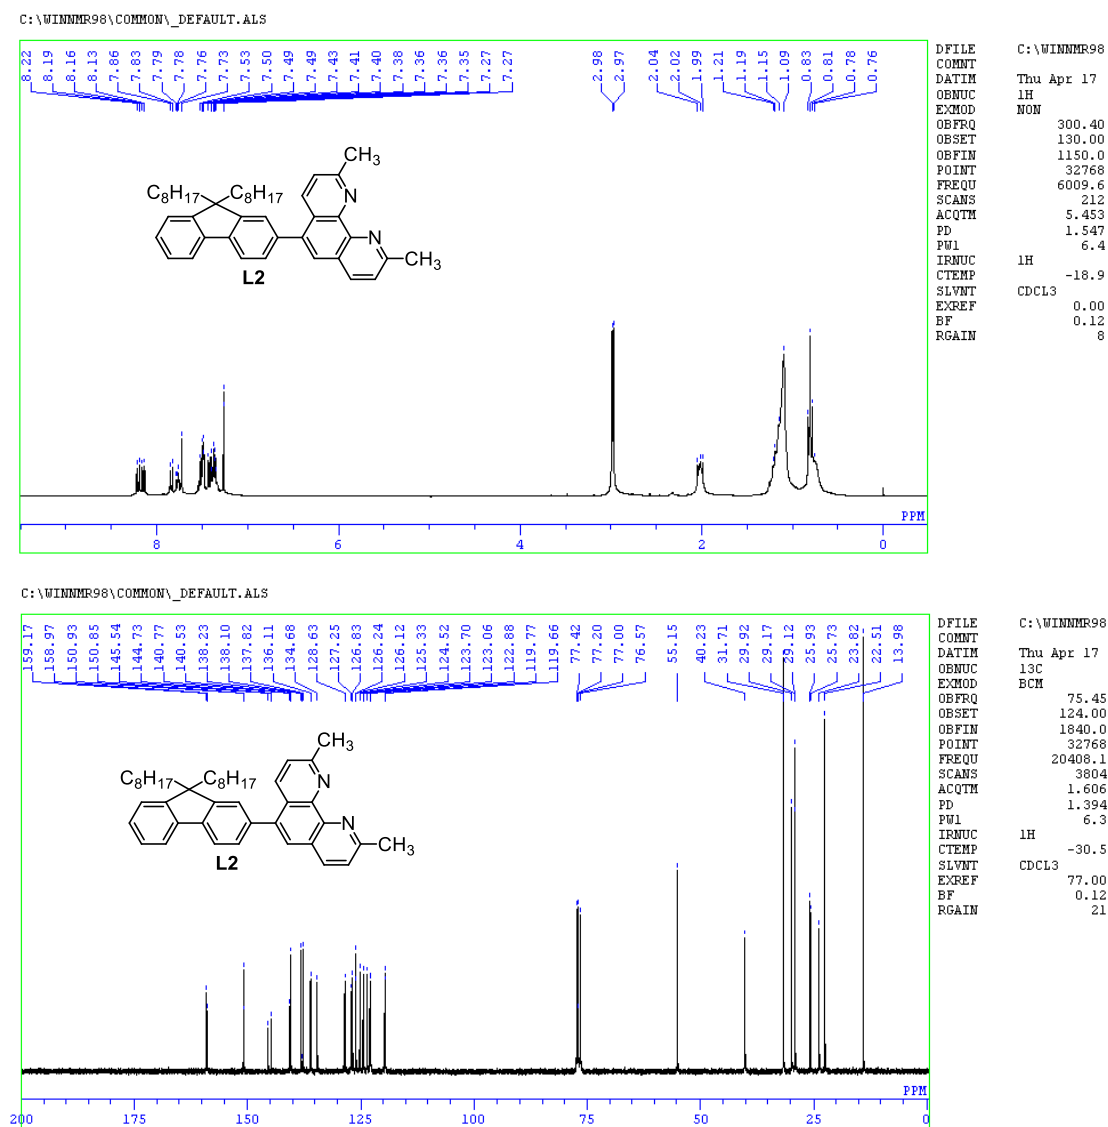

**Figure S1. <sup>1</sup>H- and <sup>13</sup>C-NMR spectra of L2.**

## 2. Molecular weight measurement

Molecular weight of metallo-supramolecular polymer<sup>[1]</sup> was determined by SEC-viscometry–RALLS (size exclusion chromatography-viscometry-right angle light scattering solvent) system consisting of a pump, solvent degasser, liquid chromatograph, refractive index detector, column oven, viscotek 270 dual detector. The eluent was acetonitrile at a flow speed of 1 mL/min. The column temperature was 30 °C. The synthesized polymers ( $c = 1.0$  mg/mL) show weight-average molecular weight using polyethylene oxide-PEO-22K as standard, when 20  $\mu$ L of acetonitrile solution was injected. The molecular weight was obtained by automatic program calculation taking account of viscosity and RALLS factor into consideration. The representative figure of **polyCd** for molecular weight is shown in **Figure S3**.

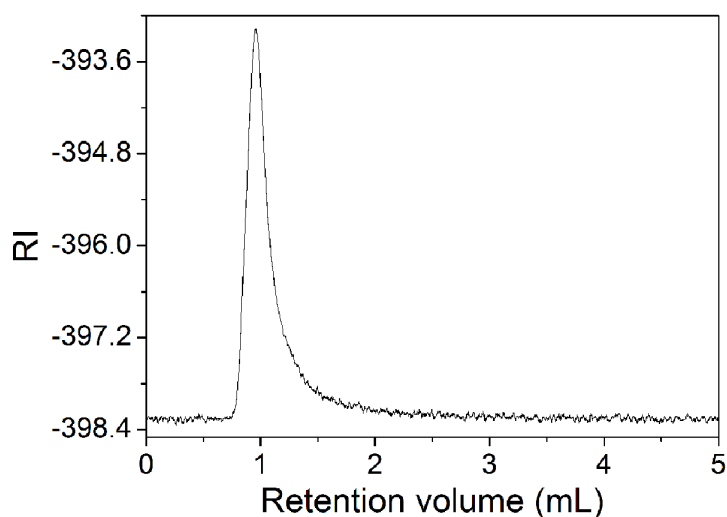

**Figure S2.** The elution peak of **polyCd** in SEC-viscometry–RALL in acetonitrile at room temperature.

## 3. Cd-Cd distance in polyCd

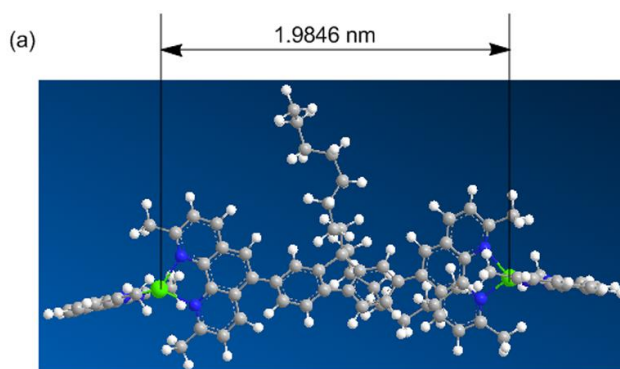

**Figure S3.** Intermetal distance of Cd ions in **polyCd**.

#### 4. IR spectra of polyCd and L2-Cd-L2

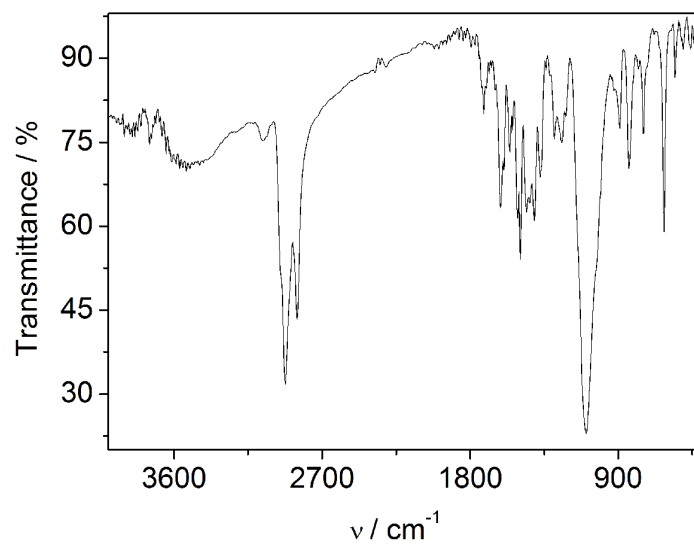

**Figure S4.** IR spectrum of polyCd.

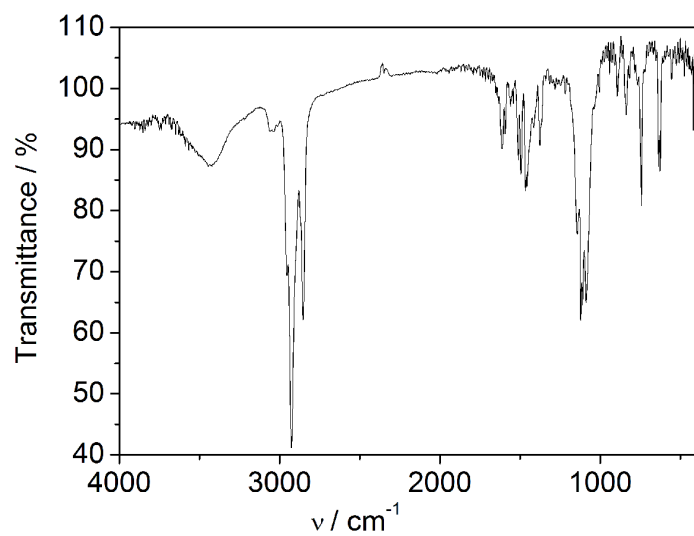

**Figure S5.** IR spectrum of L2-Cd-L2.

## 5. UV spectra of L1 and polyCd

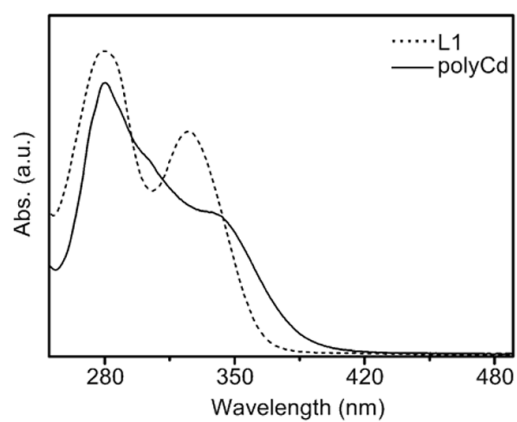

**Figure S6.** UV-vis spectra of **L1** ( $1 \times 10^{-5}$  M in  $\text{CH}_2\text{Cl}_2$ ) and **polyCd** ( $1 \times 10^{-5}$  M in  $\text{CH}_3\text{CN}$ ).

## 6. UV spectra of L2 and L2-Cd-L2

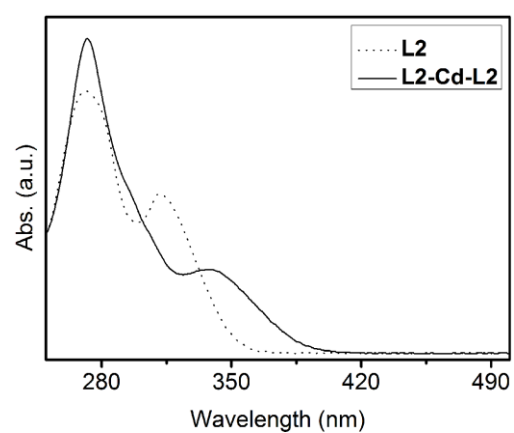

**Figure S7.** UV-vis spectra of **L2** ( $1 \times 10^{-5}$  M in  $\text{CH}_2\text{Cl}_2$ ) and **L2-Cd-L2** ( $1 \times 10^{-5}$  M in  $\text{CH}_3\text{CN}$ ).

## 7. UV-vis spectral titration in the synthesis of L2-Cd-L2

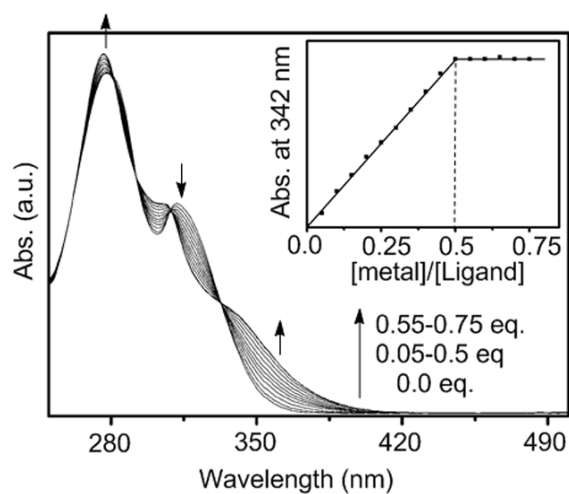

**Figure S8.** UV-vis spectral changes in the titration of the Cd(ClO<sub>4</sub>)<sub>2</sub>·6H<sub>2</sub>O solution (CH<sub>3</sub>CN,  $c = 5 \times 10^{-4}$  M) to an L2 solution (CH<sub>2</sub>Cl<sub>2</sub>,  $c = 1.0 \times 10^{-5}$  M,  $l = 1$  cm) at rt. The arrows indicate the direction of spectral changes. The inset shows the change in abs. at 342 nm as a function of added Cd(II) salt.

## 8. Binding constants of polyCd and L2-Cd-L2

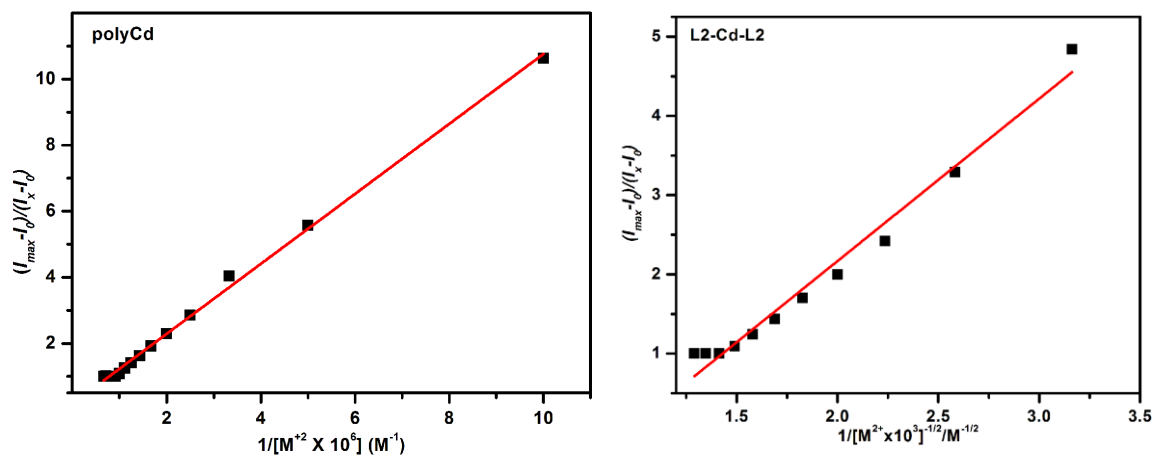

**Figure S9.** Binding constants of polyCd and L2-Cd-L2.

## 9. Emission spectra of L2 and L2-Cd-L2

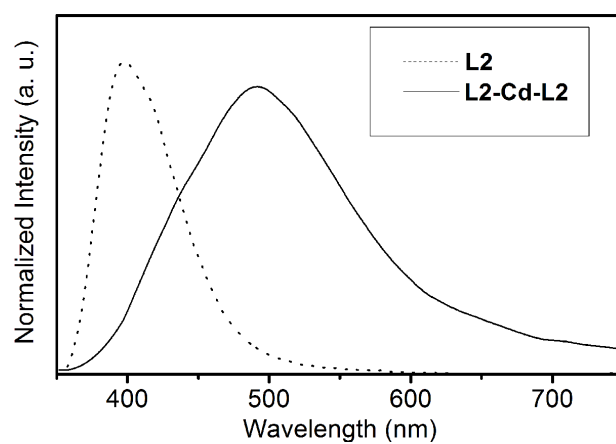

**Figure S10.** Emission spectra of **L2** ( $1 \times 10^{-5}$  M in  $\text{CH}_2\text{Cl}_2$ ) and **L2-Cd-L2** ( $1 \times 10^{-5}$  M in  $\text{CH}_3\text{CN}$ ) at rt.

## 10. Reference

[1] M. Chipper, M. A. R. Meier, J. M. Johannes, U. S. Schubert, *Macromol. Chem. Phys.* 2007, **208**, 679.
